# Supplementary material
Source: PubMed Central journal article supplement (PMC9374695)
Supplement: 41467_2022_31838_MOESM3_ESM.pdf [file 41467_2022_31838_MOESM3_ESM.pdf]

## **Description of Additional Supplementary Files**

File Name: Supplementary Data 1

Description: The relative reduction data underlying Figure 2.

File Name: Supplementary Data 2

Description: The relative reduction data underlying Figure 3.

File Name: Supplementary Data 3

Description: Estimates of interaction between vaccination and previous infection status, and age.

File Name: Supplementary Data 4

Description: Data underlying Figure 1.

File Name: Supplementary Data 5

Description: Accession IDs available in the GISAID database of the WGS data used in this study.
